# Supplementary material for: CCM2–CCM3 interaction stabilizes their protein expression and permits endothelial network formation
Source: PubMed Central journal article supplement — J Cell Biol. 2015 Mar 30;208(7):987–1001. doi: 10.1083/jcb.201407129 (PMC4384732; doi:10.1083/jcb.201407129), 2015-03-30
Supplement: supp_jcb.201407129_JCB_201407129_sm.pdf [file supp_jcb.201407129_JCB_201407129_sm.pdf]

Draheim et al., <http://www.jcb.org/cgi/content/full/jcb.201407129/DC1>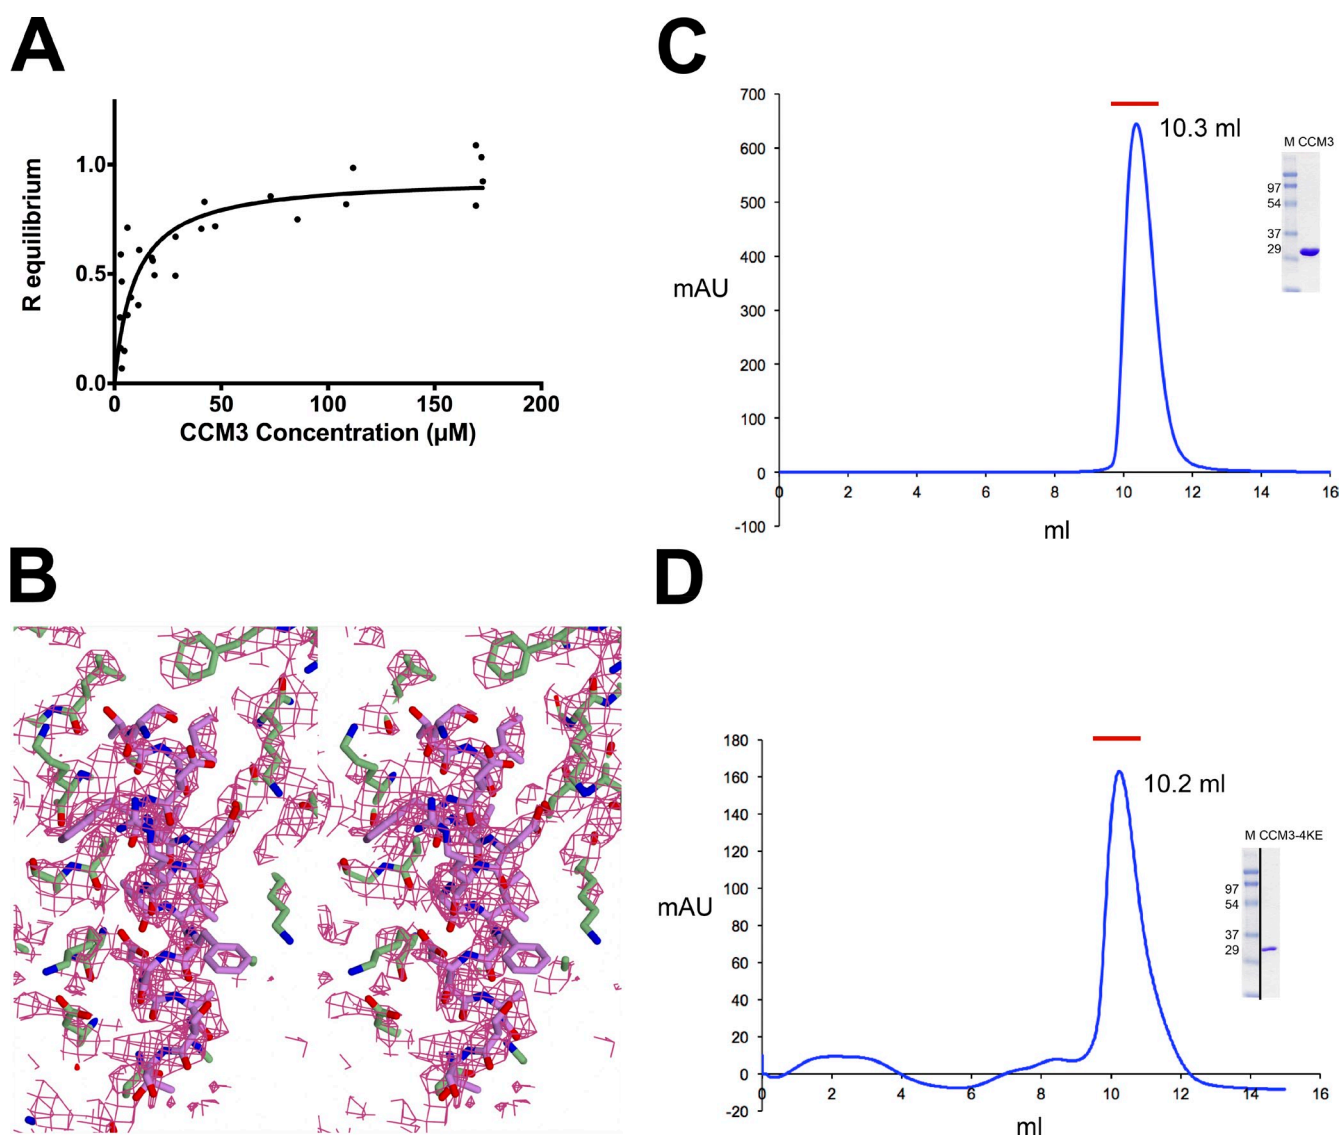

Figure S1. **Biolayer interferometry, simulated annealing omit map, and size exclusion chromatography.** (A) Affinity determination for CCM2 LD binding to CCM3 by biolayer interferometry.  $K_d$  was calculated with one-site saturation binding curve fitting using R equilibrium and CCM3 concentration. Value is determined to be  $9.5 \pm 2.5 \mu\text{M}$ . There are a total of 27 data points from three dilution series. (B) A stereoview simulated annealing omit map calculated using Phenix is shown in purple at  $1\sigma$ . N and C termini of CCM2 LD peptide are shown. CCM2 is shown in purple, CCM3 in green. (C and D) Size exclusion chromatography (S75 column; GE Healthcare) and SDS-PAGE of elution peak for wild-type CCM3 (C) and CCM3<sup>4KE</sup> (D). Chromatographs are representative of five independent purifications of wild-type CCM3 and one purification of CCM3<sup>4KE</sup>. The black line indicates a break in the gel.

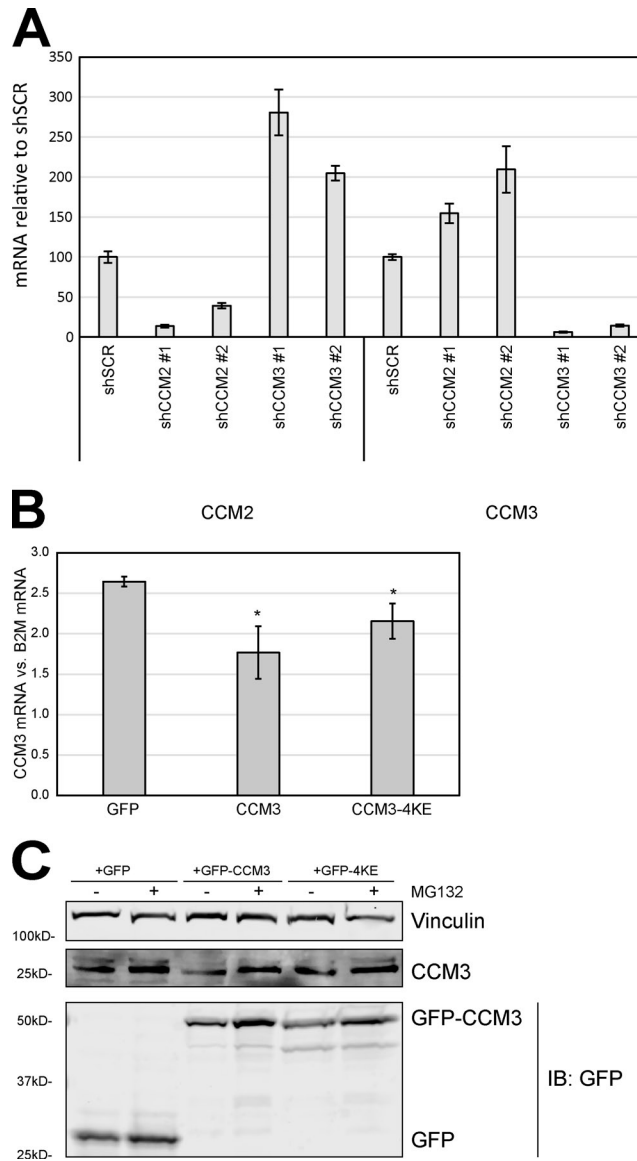

Figure S2. **qPCR analysis of CCM2 or CCM3 knockdown cells and qPCR analysis and proteasome inhibition of cells overexpressing CCM3.** (A) RNA isolated from CCM2 and CCM3 knockdown cell lines was analyzed for CCM2 and CCM3 levels using qPCR. The bar chart represents the relative (vs. shSCR) expression levels once normalized to loading control B2M. Data are mean  $\pm$  SEM (error bars) from three experiments. (B and C) Exogenous expression of CCM3 leads to decreased CCM3 levels and proteasome-dependent degradation of endogenous protein. (B) RNA isolated from EA.hy926 cells stably expressing either GFP, GFP-CCM3, or GFP-CCM3-4KE was analyzed for endogenous CCM3 using real-time PCR (primers only recognize UTR). Error bars indicate SEM. (C) EA.hy926 cells stably expressing GFP, GFP-CCM3, or GFP-CCM3-4KE were treated with proteasome inhibitor MG132 or DMSO. Lysates from the treated cells were immunoblotted for endogenous CCM3.

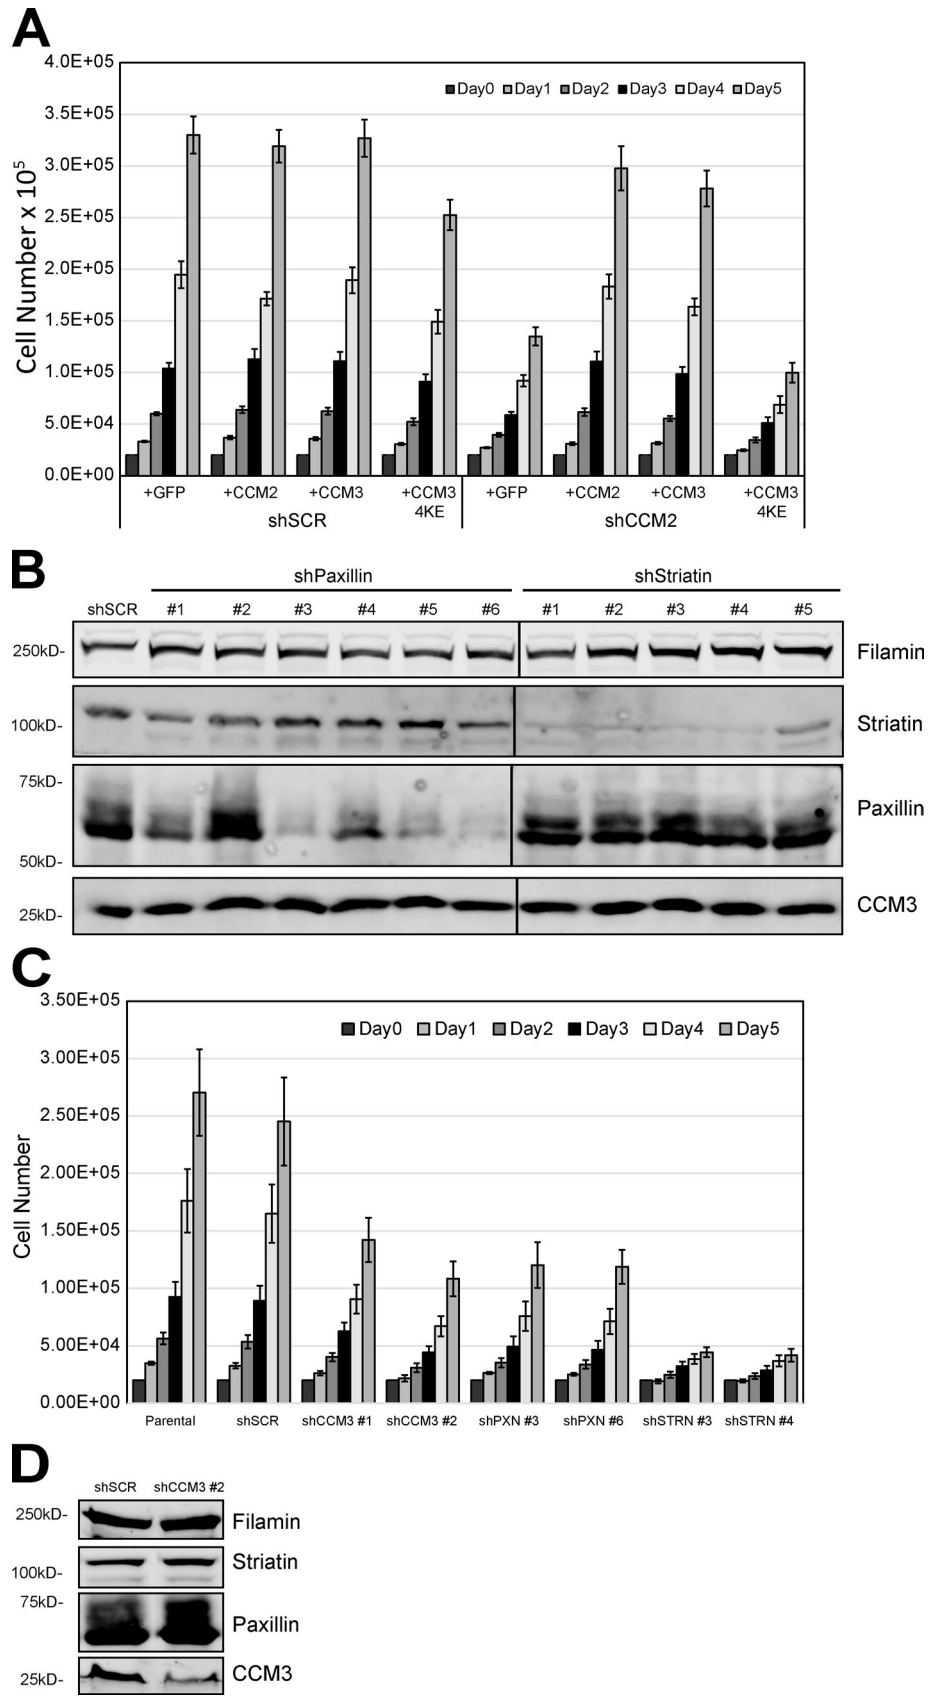

Figure S3. **Loss of CCM3 binding partners Striatin or Paxillin leads to defects in cell growth, but does not affect CCM3 expression.** (A) The effects of stably expressing GFP, GFP-CCM2, GFP-CCM3, and GFP-CCM3<sup>4KE</sup> in stable control (shSCR) and CCM2 knockdown (shCCM2 #1) EA.hy926 cells were evaluated in a 5-d growth assay. The mean cell number  $\pm$  SEM (error bars) from at least nine experiments is plotted. (B) Immunoblotting of lysates from STRN or PAXN knockdown EA.hy926 cells. EA.hy926 cells stably infected with control scrambled shRNA (shSCR) or with shRNAs against Paxillin (shPAXN #1–6) or Striatin-1 (shSTRN #1–5) were lysed and expression was probed by immunoblotting. CCM3 levels were also evaluated, but remained unchanged. Vinculin was used as a loading control. (C) Stable PAXN and STRN knockdown cells were evaluated for 5 d in a cell growth assay and compared with cells infected with a virus expressing a scrambled hairpin and CCM3 knockdown cells. The bar graph reports the mean cell number  $\pm$  SEM (error bars) from at least nine experiments. (D) Expression of vinculin (loading control), striatin, paxillin, and CCM3 in shSCR control cells and CCM3 knockdown cells was assessed by immunoblotting.

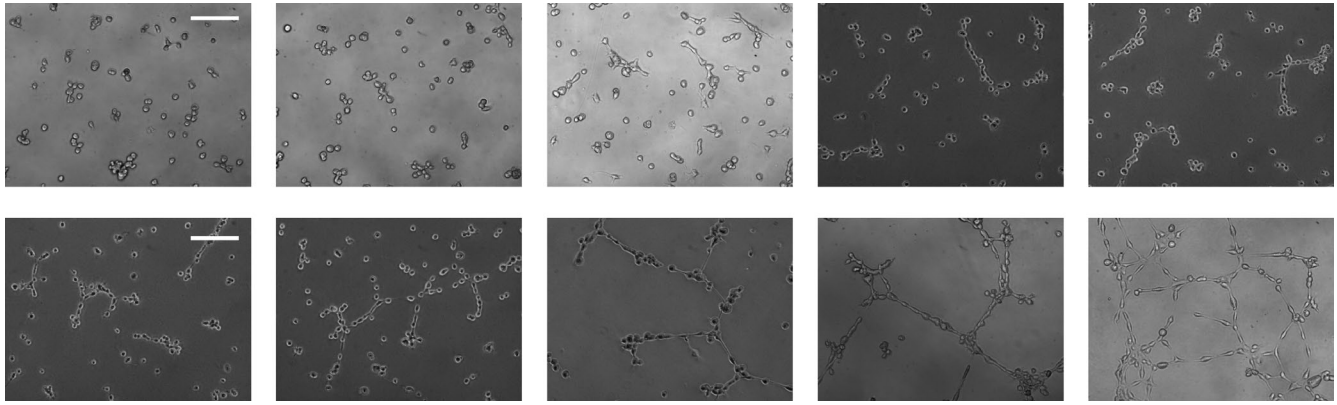

Figure S4. **Variability in network formation in CCM2 knockdown cells rescued with GFP-CCM2<sup>LI/RR</sup>**. Representative images of networks formed by CCM2 knockdown EA.hy926 lines reexpressing GFP-CCM2<sup>LI/RR</sup>.

Table S1. **Comparison of apparent binding affinities for FAT or FAT-H domains with LD motifs**

| Protein | LD motif           | Technique | Apparent $K_d$ |
|---------|--------------------|-----------|----------------|
| CCM3    | CCM2 <sup>LD</sup> | Pull-down | 8.6 $\mu$ M    |
|         | CCM2 <sup>LD</sup> | BLI       | 9.5 $\mu$ M    |
|         | CCM2 <sup>FL</sup> | Pull-down | 8.8 $\mu$ M    |
|         | Paxillin-LD1       | SPR       | 17 $\mu$ M     |
|         | Paxillin-LD2       | SPR       | 39 $\mu$ M     |
| FAK     | Paxillin-LD4       | SPR       | 23 $\mu$ M     |
|         | Paxillin-LD2       | ITC       | 9–11.5 $\mu$ M |
|         | Paxillin-LD4       | NMR       | 25.3 $\mu$ M   |
| Pyk2    | Paxillin-LD2       | ITC       | 45 $\mu$ M     |
| GIT1    | Paxillin-LD4       | ITC       | 10 $\mu$ M     |
|         | Paxillin-LD2       | SPR       | 25 $\mu$ M     |
|         | Paxillin-LD4       | SPR       | 7 $\mu$ M      |

Citations: CCM3–paxillin interactions (Li et al., 2011), FAK–paxillin (Gao et al., 2004), Pyk2–paxillin (Gao et al., 2004), GIT1–paxillin (Schmalzigaug et al., 2007; Zhang et al., 2008). SPR, surface plasmon resonance; ITC, isothermal titration calorimetry; NMR, nuclear magnetic resonance; BLI, biolayer interferometry.

Table S2. Data collection and refinement statistics

| Criterion                                       | Value                                   |
|-------------------------------------------------|-----------------------------------------|
| <b>Data collection</b>                          |                                         |
| x-ray source                                    | NSLS X25                                |
| Space group                                     | $P2_12_12_1$                            |
| Wavelength (Å)                                  | 1.1000                                  |
| Cell dimensions                                 |                                         |
| a, b, c (Å)                                     | 61.9, 113.6, 120.0                      |
| $\alpha, \beta, \gamma$ (°)                     | 90, 90, 90                              |
| Resolution range (Å)                            | 50.0–2.8 (2.9–2.8)<br>[3.15–3.02]       |
| No. of unique reflections                       | 21,186                                  |
| Completeness (%)                                | 99.0 (97.5) [97.0]                      |
| $R_{\text{sym}}$ (%)                            | 10.7 (93.7) [58.3]                      |
| $R_{\text{pim}}$ (%)                            | 6.2 (38.8) [23.1]                       |
| $\langle I \rangle / \langle \sigma(I) \rangle$ | 16.0 (1.6) [3.1]                        |
| Redundancy                                      | 6.2 (6.2) [6.2]                         |
| Wilson B-factor (Å <sup>2</sup> )               | 78.9                                    |
| <b>Refinement</b>                               |                                         |
| Resolution range (Å)                            | 49.5–2.8 (2.9–2.8)                      |
| R factor (%)                                    |                                         |
| Working set                                     | 23.9 (25.6)                             |
| Test set                                        | 27.7 (30.2)                             |
| Reflections (total)                             | 21,136                                  |
| Free R reflections (%)                          | 5.09                                    |
| Free R reflections, No.                         | 1,076                                   |
| Residues built (Total #)                        | 735                                     |
| Chain A (CCM3)                                  | 17–86, 108–133, 166–207                 |
| Chain B (CCM3)                                  | 12–93, 96–149, 161–209                  |
| Chain C (CCM3) and chain E (CCM2)               | C: 1–86, 90–153, 156–210;<br>E: 224–239 |
| Chain D (CCM3)                                  | 15–87, 91–154, 157–210                  |
| No. non-hydrogen protein atoms                  | 5,969                                   |
| Mean B-factor (Å <sup>2</sup> )                 | 71.5                                    |
| <b>Model statistics</b>                         |                                         |
| R.M.S.D. bond lengths (Å)                       | 0.002                                   |
| R.M.S.D. bond angle (°)                         | 0.583                                   |
| Ramachandran plot (%)                           |                                         |
| Favored / allowed / outliers                    | 98.6/1.4/0.0                            |
| <b>MolProbity score</b>                         |                                         |
| Score                                           | 1.49                                    |
| Percentile                                      | 100th                                   |

Parentheses indicate statistics for the high-resolution shell, brackets indicate statistics for the shell where  $\langle I \rangle / \langle \sigma(I) \rangle \geq 3$ .

## References

- Gao, G., K.C. Prutzman, M.L. King, D.M. Scheswohl, E.F. DeRose, R.E. London, M.D. Schaller, and S.L. Campbell. 2004. NMR solution structure of the focal adhesion targeting domain of focal adhesion kinase in complex with a paxillin LD peptide: evidence for a two-site binding model. *J. Biol. Chem.* 279:8441–8451. <http://dx.doi.org/10.1074/jbc.M309808200>
- Li, X., W. Ji, R. Zhang, E. Folta-Stogniew, W. Min, and T.J. Boggon. 2011. Molecular recognition of Leucine-Aspartate Repeat (LD) motifs by the FAT-homology domain of cerebral cavernous malformation 3 (CCM3). *J. Biol. Chem.* 286:26138–26147. <http://dx.doi.org/10.1074/jbc.M110.211250>
- Schmalzigaug, R., M.L. Garron, J.T. Roseman, Y. Xing, C.E. Davidson, S.T. Arold, and R.T. Premont. 2007. GIT1 utilizes a focal adhesion targeting-homology domain to bind paxillin. *Cell. Signal.* 19:1733–1744. <http://dx.doi.org/10.1016/j.cellsig.2007.03.010>
- Zhang, Z.M., J.A. Simmerman, C.D. Guibao, and J.J. Zheng. 2008. GIT1 paxillin-binding domain is a four-helix bundle, and it binds to both paxillin LD2 and LD4 motifs. *J. Biol. Chem.* 283:18685–18693. <http://dx.doi.org/10.1074/jbc.M801274200>
